# Supplementary material for: Role of the postinspiratory complex in regulating swallow–breathing coordination and other laryngeal behaviors
Source: eLife. 2023 Jun 5;12:e86103. doi: 10.7554/eLife.86103 (PMC10264072; doi:10.7554/eLife.86103)
Supplement: Supplementary file 1. [file elife-86103-supp1.xlsx]

## Sheet: Sheet1
A																	B
Laryngeal Activation			+ ChATcre:Ai32					+ Vglut2cre:Ai32				+ ChATcre:Vglut2FlpO:ChR2					Upper Airway Motor Activation			+ ChATcre:Vglut2FlpO:ChR2
			Stimulation					Stimulation				Stimulation								Stimulation
			N=8					N=11				N=7								N=4
			mean	(	SD	)		mean	(	SD	)	mean	(	SD	)					mean	(	SD	)
		40ms																	40ms
		Vagus Duration (ms)	77	(	14	)		85	(	8	)	77	(	9	)				Vagus Duration (ms)	124	(	33	)
		Laryngeal Complex Duration (ms)	76	(	9	)		81	(	13	)	72	(	5	)				Laryngeal Complex Duration (ms)	143	(	47	)
		80ms																	80ms
		Vagus Duration (ms)	108	(	16	)		101	(	27	)	108	(	11	)				Vagus Duration (ms)	139	(	19	)
		Laryngeal Complex Duration (ms)	105	(	16	)		103	(	23	)	117	(	12	)				Laryngeal Complex Duration (ms)	155	(	32	)
		120ms																	120ms
		Vagus Duration (ms)	140	(	31	)		123	(	55	)	144	(	19	)				Vagus Duration (ms)	155	(	9	)
		Laryngeal Complex Duration (ms)	131	(	20	)		125	(	57	)	148	(	9	)				Laryngeal Complex Duration (ms)	168	(	23	)
		160ms																	160ms
		Vagus Duration (ms)	163	(	25	)		114	(	62	)	149	(	38	)				Vagus Duration (ms)	187	(	4	)
		Laryngeal Complex Duration (ms)	164	(	32	)		128	(	68	)	170	(	21	)				Laryngeal Complex Duration (ms)	187	(	14	)
		200ms																	200ms
		Vagus Duration (ms)	197	(	62	)		132	(	50	)	170	(	51	)				Vagus Duration (ms)	218	(	19	)
		Laryngeal Complex Duration (ms)	243	(	146	)		152	(	57	)	199	(	26	)				Laryngeal Complex Duration (ms)	212	(	29	)
