# Supplementary material for: Role of the postinspiratory complex in regulating swallow–breathing coordination and other laryngeal behaviors
Source: eLife. 2023 Jun 5;12:e86103. doi: 10.7554/eLife.86103 (PMC10264072; doi:10.7554/eLife.86103)
Supplement: Supplementary file 2. [file elife-86103-supp2.xlsx]

## Sheet: Sheet1
		Water Swallow				+ ChATcre:Ai32 Stimulation
		mean	(	SD	)	mean	(	SD	)	p-value	t	df	Change
	(n=10)
	Swallow Duration (ms)	290	(	125	)	199	(	125	)	0.02	3.05	8	↓
	Hypoglossal Duration (ms)	297	(	129	)	213	(	127	)	0.03	2.65	7	↓
	Vagus Duration (ms)	294	(	101	)	226	(	112	)	0.05	2.32	7	↓
	Laryngeal Complex Duration (ms)	297	(	78	)	165	(	64	)	0.009	4.19	5	↓
	Schluckatmung Duration (ms)	228	(	-	)	-	(	-	)	-	-	-	-
	Diaphragm Inter-Burst Interval (ms)	1002	(	691	)	1362	(	937	)	0.06	2.22	8	-
	SR Inspiratory Delay (ms)	482	(	696	)	808	(	535	)	0.04	2.51	8	↑
	Swallow Sequence (ms)	24	(	40	)	18	(	20	)	0.29	1.14	8	-
	Swallow Onset: Insp Peak (ms)	268	(	133	)	436	(	470	)	0.24	1.28	8	-
	Swallow Onset: Insp Onset (0-1 of RC)	0.34	(	0.09	)	0.34	(	0.08	)	0.97	0.04	8	-
	Hypoglossal Amplitude (% max)	73	(	15	)	48	(	19	)	0.002	4.61	7	↓
	Vagus Amplitude (% max)	73	(	17	)	53	(	27	)	0.06	2.26	7	-
	Submental Complex Amplitude (% max)	78	(	17	)	43	(	40	)	0.04	2.73	5	↓
	Laryngeal Complex Amplitude (% max)	74	(	23	)	55	(	36	)	0.07	2.29	5	-
	Schluckatmung Amplitude (% max)	-	(	-	)	-	(	-	)	-	-	-	-
		Water Swallow				+ Vglut2cre:Ai32 Stimulation
		mean	(	SD	)	mean	(	SD	)	p-value	t	df	Change
	(n=11)
	Swallow Duration (ms)	256	(	108	)	175	(	94	)	0.007	3.4	10	↓
	Hypoglossal Duration (ms)	286	(	95	)	193	(	69	)	0.0007	4.8	10	↓
	Vagus Duration (ms)	256	(	76	)	203	(	66	)	0.04	2.32	10	↓
	Laryngeal Complex Duration (ms)	311	(	149	)	250	(	100	)	0.2	1.38	10	-
	Schluckatmung Duration (ms)	150	(	48	)	176	(	70	)	0.83	0.24	2	-
	Diaphragm Inter-Burst Interval (ms)	834	(	488	)	749	(	316	)	0.54	0.64	10	-
	SR Inspiratory Delay (ms)	437	(	438	)	381	(	232	)	0.68	0.42	10	-
	Swallow Sequence (ms)	29	(	38	)	22	(	30	)	0.37	0.95	10	-
	Swallow Onset: Insp Peak (ms)	160	(	103	)	200	(	119	)	0.4	0.88	10	-
	Swallow Onset: Insp Onset (0-1 of RC)	0.29	(	0.07	)	0.34	(	0.09	)	0.25	1.23	10	-
	Hypoglossal Amplitude (% max)	83	(	13	)	77	(	30	)	0.38	0.92	10	-
	Vagus Amplitude (% max)	84	(	13	)	58	(	18	)	0.003	3.9	10	↓
	Submental Complex Amplitude (% max)	88	(	10	)	52	(	33	)	0.004	3.77	9	↓
	Laryngeal ComplexAmplitude (% max)	78	(	16	)	85	(	76	)	0.76	0.32	10	-
	Schluckatmung Amplitude (% max)	80	(	12	)	170	(	152	)	0.62	1.02	2	-
		Water Swallow				+ ChATcre:Vglut2FlpO:ChR2 Stimulation
		mean	(	SD	)	mean	(	SD	)	p-value	t	df	Change
	(n=6)
	Swallow Duration (ms)	191	(	63	)	114	(	19	)	0.02	3.54	5	↓
	Hypoglossal Duration (ms)	221	(	65	)	131	(	30	)	0.03	3.04	5	↓
	Vagus Duration (ms)	230	(	68	)	151	(	34	)	0.008	4.3	5	↓
	Laryngeal Complex Duration (ms)	244	(	66	)	197	(	119	)	0.39	0.95	5	-
	Schluckatmung Duration (ms)	177	(	-	)	100	(	-	)	-	-	-	-
	Diaphragm Inter-Burst Interval (ms)	664	(	171	)	708	(	347	)	0.64	0.5	5	-
	SR Inspiratory Delay (ms)	337	(	131	)	406	(	139	)	0.15	1.72	5	-
	Swallow Sequence (ms)	109	(	90	)	41	(	48	)	0.17	1.61	5	-
	Swallow Onset: Insp Peak (ms)	181	(	135	)	155	(	135	)	0.56	0.63	5	-
	Swallow Onset: Insp Onset (0-1 of RC)	0.31	(	0.04	)	0.32	(	0.07	)	0.37	0.99	5	-
	Hypoglossal Amplitude (% max)	85	(	10	)	60	(	26	)	0.08	2.23	5	-
	Vagus Amplitude (% max)	84	(	10	)	46	(	12	)	0.003	5.61	5	↓
	Submental Complex Amplitude (% max)	83	(	13	)	36	(	33	)	0.005	4.7	5	↓
	Laryngeal ComplexAmplitude (% max)	83	(	12	)	64	(	34	)	0.14	1.75	5	-
	Schluckatmung Amplitude (% max)	85	(	-	)	59	(	-	)	-	-	-	-
