# Supplementary material for: Role of the postinspiratory complex in regulating swallow–breathing coordination and other laryngeal behaviors
Source: eLife. 2023 Jun 5;12:e86103. doi: 10.7554/eLife.86103 (PMC10264072; doi:10.7554/eLife.86103)
Supplement: Supplementary file 3. [file elife-86103-supp3.xlsx]

## Sheet: Sheet1
	Water Swallow		Male (n=5)				Female (n=4)
			mean	(	SD	)	mean	(	SD	)	p-value	F	t	df	Change
		Swallow Duration (ms)	295	(	134	)	284	(	133	)	0.9	1.02	0.9	7	-
		XII Duration (ms)	308	(	127	)	280	(	158	)	0.79	1.55	0.28	6	-
		Vagus Duration (ms)	294	(	107	)	292	(	115	)	0.98	1.16	0.03	6	-
		Laryngeal Complex Duration (ms)	299	(	46	)	295	(	115	)	0.95	6.21	0.06	4	-
		Schluckatmung Duration (ms)	228	(	-	)	-	(	-	)	-	-	-	-	-
		Diaphragm Inter-Burst Interval (ms)	1261	(	835	)	678	(	304	)	0.23	7.57	1.31	7	-
		SR Inspiratory Delay (ms)	717	(	900	)	188	(	71	)	0.29	161.9	1.16	7	-
		Swallow Sequence (ms)	1	(	5	)	53	(	47	)	0.04	75.17	2.53	7	↑
		Swallow Onset: Insp Peak (ms)	308	(	101	)	218	(	167	)	0.35	2.75	1.01	7	-
		Swallow Onset: Insp Onset (0-1 of RC)	0.33	(	0.09	)	0.36	(	0.1	)	0.72	1.08	0.38	7	-
		+ ChATcre:Ai32	Male (n=6)				Female (n=4)
		Stimulation	mean	(	SD	)	mean	(	SD	)	p-value	F	t	df	Change
		Swallow Duration (ms)	239	(	150	)	137	(	36	)	0.23	17.38	1.31	8	-
		XII Duration (ms)	244	(	147	)	147	(	35	)	0.31	18.08	1.09	7	-
		Vagus Duration (ms)	262	(	121	)	150	(	33	)	0.17	13.66	1.52	7	-
		Laryngeal Complex Duration (ms)	204	(	46	)	109	(	32	)	0.03	2.05	3.01	5	↓
		Schluckatmung Duration (ms)	-	(	-	)	-	(	-	)	-	-	-	-	-
		Diaphragm Inter-Burst Interval (ms)	1510	(	985	)	1138	(	954	)	0.57	1.07	0.59	8	-
		SR Inspiratory Delay (ms)	921	(	584	)	646	(	477	)	0.46	1.5	0.78	8	-
		Swallow Sequence (ms)	16	(	19	)	22	(	22	)	0.64	1.29	0.48	8	-
		Swallow Onset: Insp Peak (ms)	429	(	522	)	438	(	461	)	0.98	1.28	0.029	8	-
		Swallow Onset: Insp Onset (0-1 of RC)	0.31	(	0.09	)	0.38	(	0.05	)	0.26	3.78	1.21	8	-
