# Supplementary material for: Role of the postinspiratory complex in regulating swallow–breathing coordination and other laryngeal behaviors
Source: eLife. 2023 Jun 5;12:e86103. doi: 10.7554/eLife.86103 (PMC10264072; doi:10.7554/eLife.86103)
Supplement: Supplementary file 4. [file elife-86103-supp4.xlsx]

## Sheet: Sheet1
	Water Swallow		Male (n=7)				Female (n=4)
			mean	(	SD	)	mean	(	SD	)	p-value	F	t	df	Change
		Swallow Duration (ms)	254	(	108	)	258	(	125	)	0.95	1.35	0.06	9	-
		XII Duration (ms)	295	(	92	)	269	(	112	)	0.68	1.51	0.42	9	-
		Vagus Duration (ms)	248	(	59	)	270	(	110	)	0.68	3.47	0.43	9	-
		Laryngeal Complex Duration (ms)	307	(	106	)	317	(	227	)	0.92	4.6	0.11	9	-
		Schluckatmung Duration (ms)	158	(	52	)	120	(	-	)	-	-	-	-	-
		Diaphragm Inter-Burst Interval (ms)	796	(	509	)	902	(	515	)	0.75	1.02	0.33	9	-
		SR Inspiratory Delay (ms)	423	(	541	)	461	(	229	)	0.9	5.58	0.13	9	-
		Swallow Sequence (ms)	30	(	46	)	29	(	23	)	0.97	3.89	0.04	9	-
		Swallow Onset: Insp Peak (ms)	141	(	86	)	195	(	136	)	0.43	2.51	0.82	9	-
		Swallow Onset: Insp Onset (0-1 of RC)	0.3	(	0.09	)	0.28	(	0.01	)	0.74	106.7	0.35	9	-
		+ Vglut2cre:Ai32	Male (n=7)				Female (n=4)
		Stimulation	mean	(	SD	)	mean	(	SD	)	p-value	F	t	df	Change
		Swallow Duration (ms)	198	(	109	)	136	(	47	)	0.32	5.35	1.05	9	-
		XII Duration (ms)	207	(	79	)	170	(	50	)	0.42	2.5	0.84	9	-
		Vagus Duration (ms)	224	(	69	)	166	(	47	)	0.17	2.13	1.49	9	-
		Laryngeal Complex Duration (ms)	282	(	100	)	195	(	86	)	0.18	1.34	1.44	9	-
		Schluckatmung Duration (ms)	176	(	70	)	-	(	-	)	-	-	-	-	-
		Diaphragm Inter-Burst Interval (ms)	645	(	207	)	932	(	422	)	0.16	4.16	1.54	9	-
		SR Inspiratory Delay (ms)	273	(	140	)	569	(	256	)	0.03	3.31	2.53	9	↑
		Swallow Sequence (ms)	21	(	38	)	25	(	9	)	0.88	16.59	0.16	9	-
		Swallow Onset: Insp Peak (ms)	174	(	110	)	247	(	135	)	0.35	1.5	0.98	9	-
		Swallow Onset: Insp Onset (0-1 of RC)	0.35	(	0.09	)	0.32	(	0.09	)	0.59	1.13	0.56	9	-
