# Supplementary material for: Role of the postinspiratory complex in regulating swallow–breathing coordination and other laryngeal behaviors
Source: eLife. 2023 Jun 5;12:e86103. doi: 10.7554/eLife.86103 (PMC10264072; doi:10.7554/eLife.86103)
Supplement: Supplementary file 5. [file elife-86103-supp5.xlsx]

## Sheet: Sheet1
		Water Swallow				+ ChATcre:Vglut2FlpO:ChR2 Stimulation
						Upper Airway Motor Activation
		mean	(	SD	)	mean	(	SD	)	p-value	t	df	Change
	(n=4)
	Swallow Duration (ms)	236	(	25	)	155	(	14	)	0.03	20.82	1	↓
	Hypoglossal Duration (ms)	253	(	25	)	157	(	15	)	0.003	225.8	1	↓
	Vagus Duration (ms)	247	(	33	)	163	(	17	)	0.04	17.12	1	↓
	Laryngeal Complex Duration (ms)	256	(	2	)	172	(	26	)	0.21	2.87	1	-
	Schluckatmung Duration (ms)	182	(	-	)	-	(	-	)	-	-	-	-
	Diaphragm Inter-Burst Interval (ms)	684	(	74	)	779	(	269	)	0.93	0.1	1	-
	SR Inspiratory Delay (ms)	411	(	65	)	382	(	203	)	0.61	0.7	1	-
	Swallow Sequence (ms)	44	(	122	)	0.5	(	27	)	0.79	0.34	1	-
	Hypoglossal Amplitude (% max)	96	(	6	)	51	(	38	)	0.29	2.01	1	-
	Vagus Amplitude (% max)	95	(	7	)	55	(	50	)	0.41	1.33	1	-
	Submental Complex Amplitude (% max)	98	(	3	)	78	(	11	)	0.18	3.4	1	-
	Laryngeal ComplexAmplitude (% max)	90	(	14	)	70	(	18	)	0.53	0.92	1	-
	Schluckatmung Amplitude (% max)	81	(	-	)	-	(	-	)	-	-	-	-
