# Supplementary figures and images for: Role of the postinspiratory complex in regulating swallow–breathing coordination and other laryngeal behaviors
Source: eLife journal article supplement (doi:10.7554/elife.86103), 2023-06-05

**A****Durations (ms)**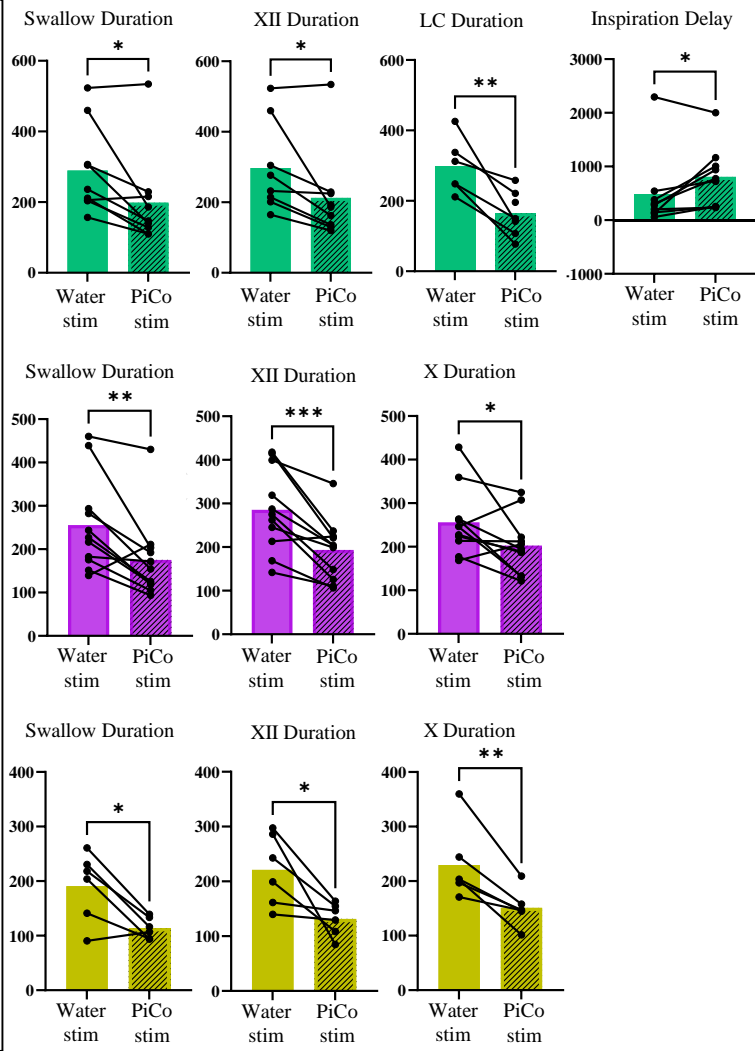**B****Amplitude (%Max of Baseline)**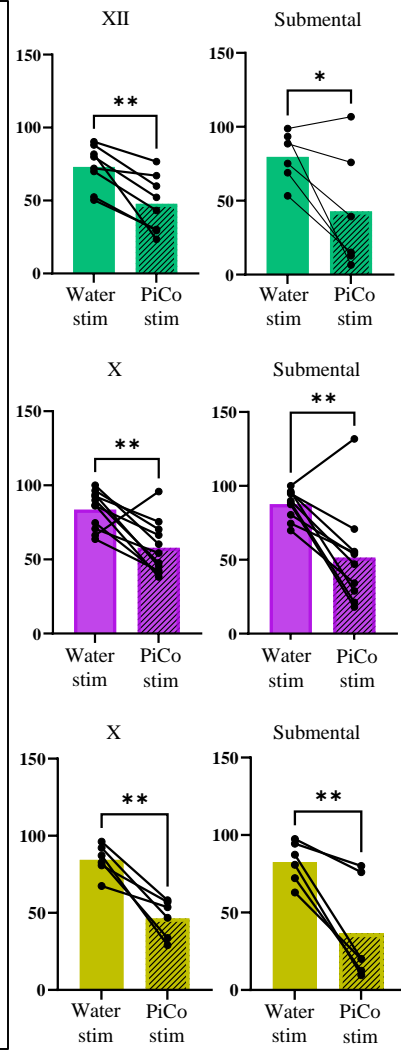**ChATcre: Ai32****Vglut2cre: Ai32****ChATcre: Vglut2FlpO:  
Chr2**

Supplement: supp [file elife-86103-supp-v1.zip]

**A**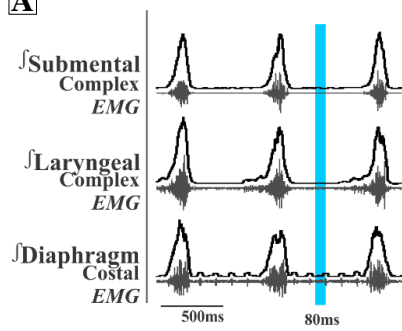**B**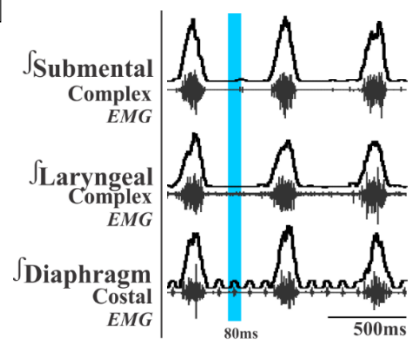**C**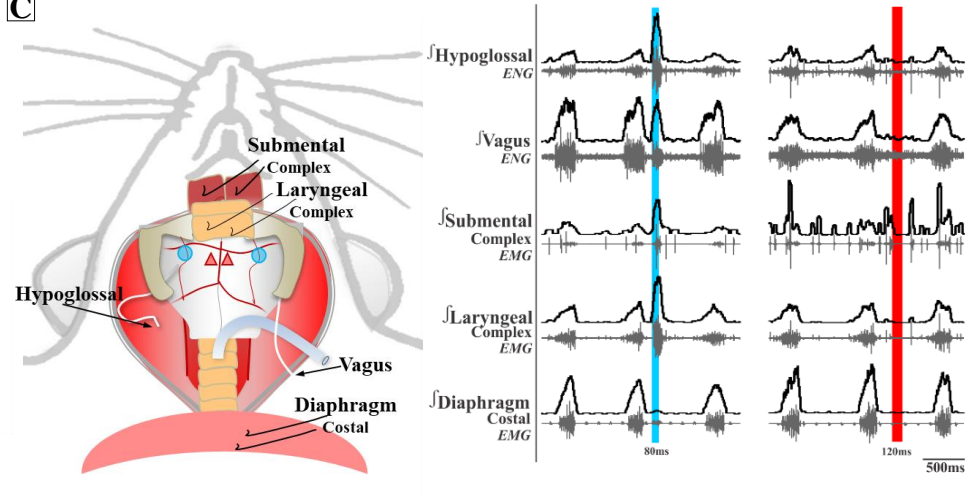

Supplement: supp [file elife-86103-supp-v1.zip]

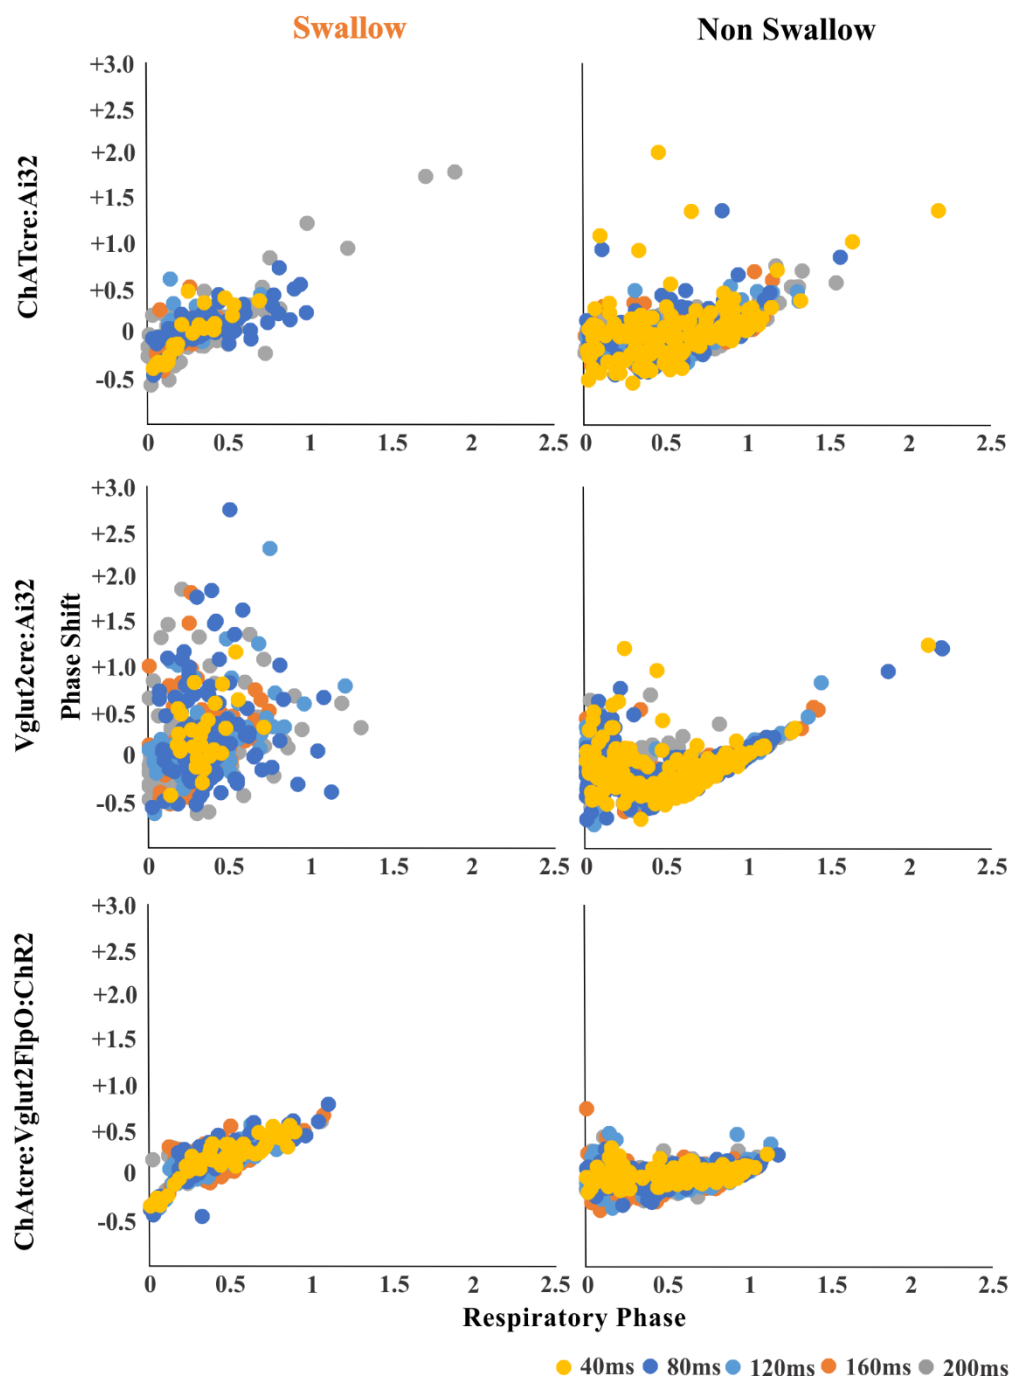

Supplement: supp [file elife-86103-supp-v1.zip]

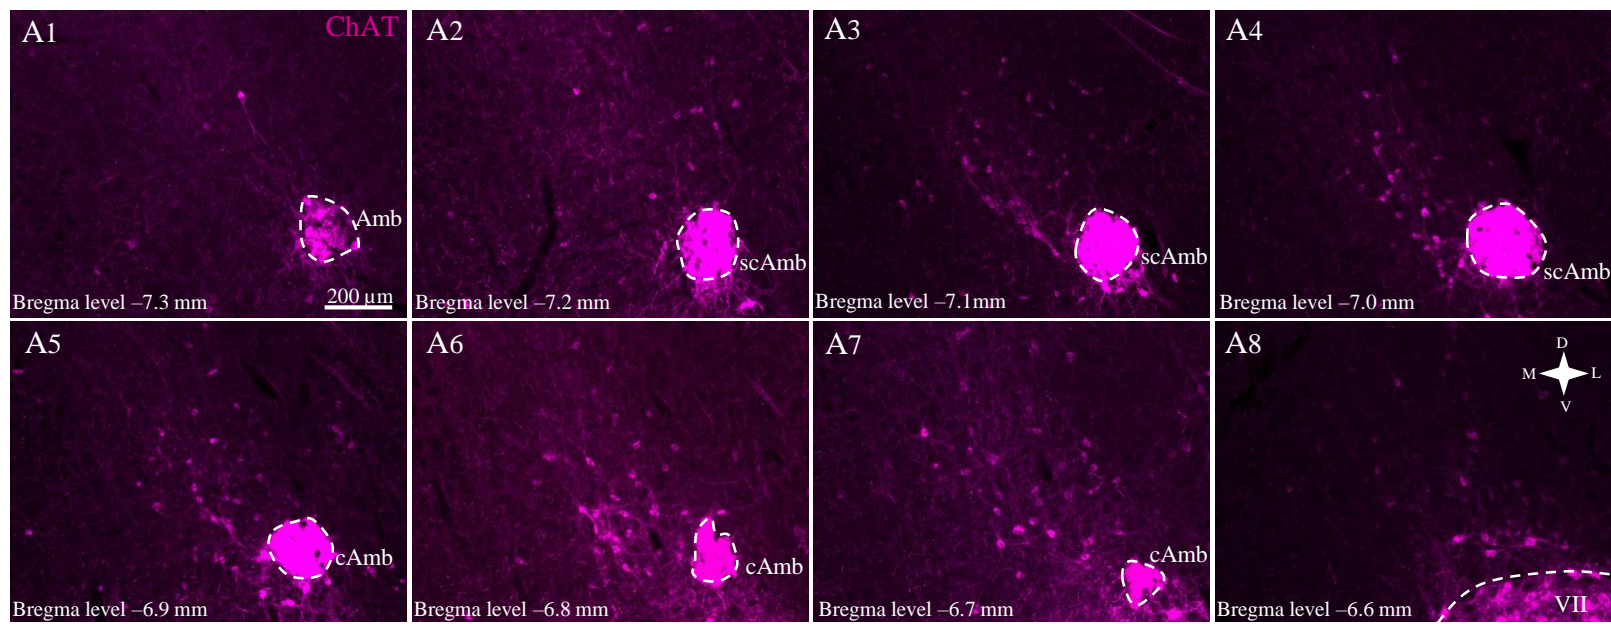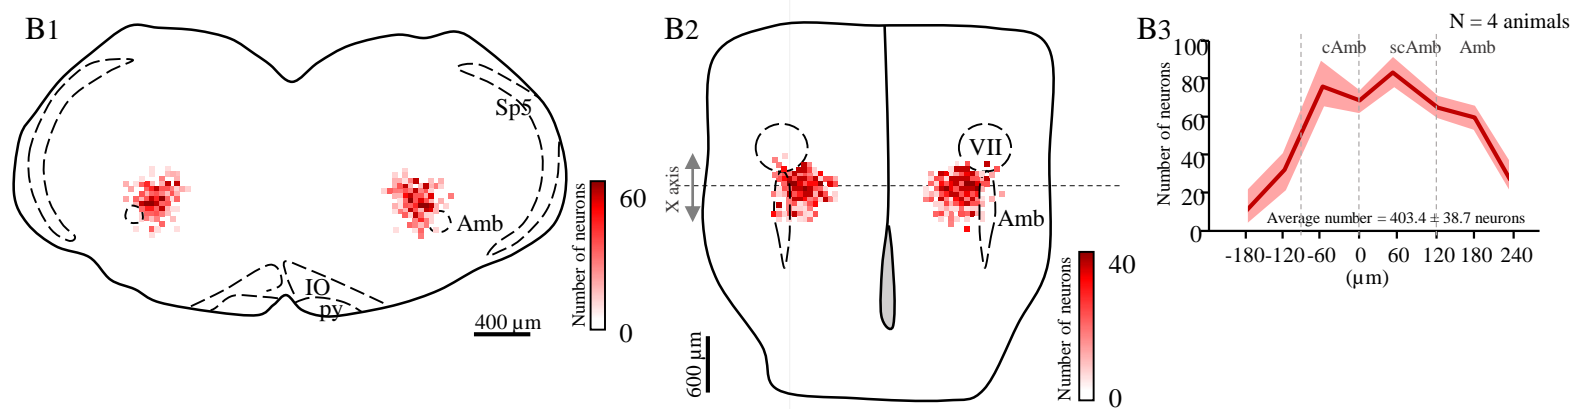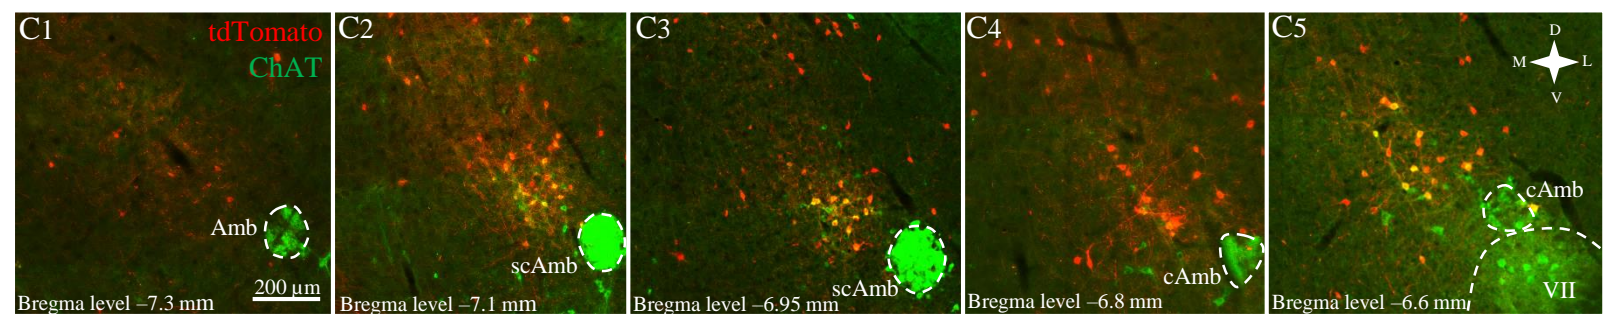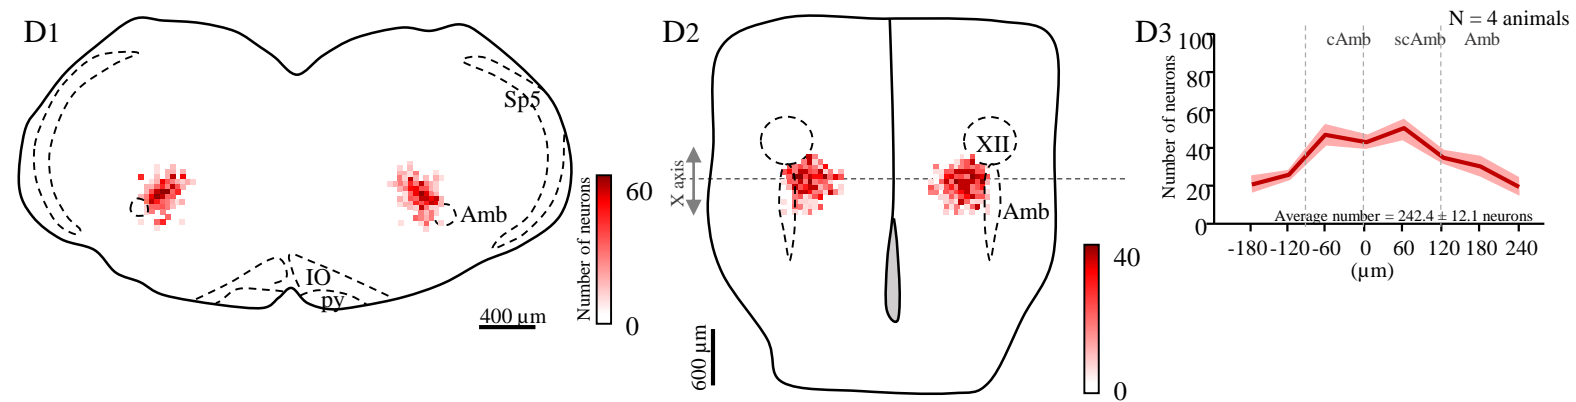

Supplement: supp [file elife-86103-supp-v1.zip]

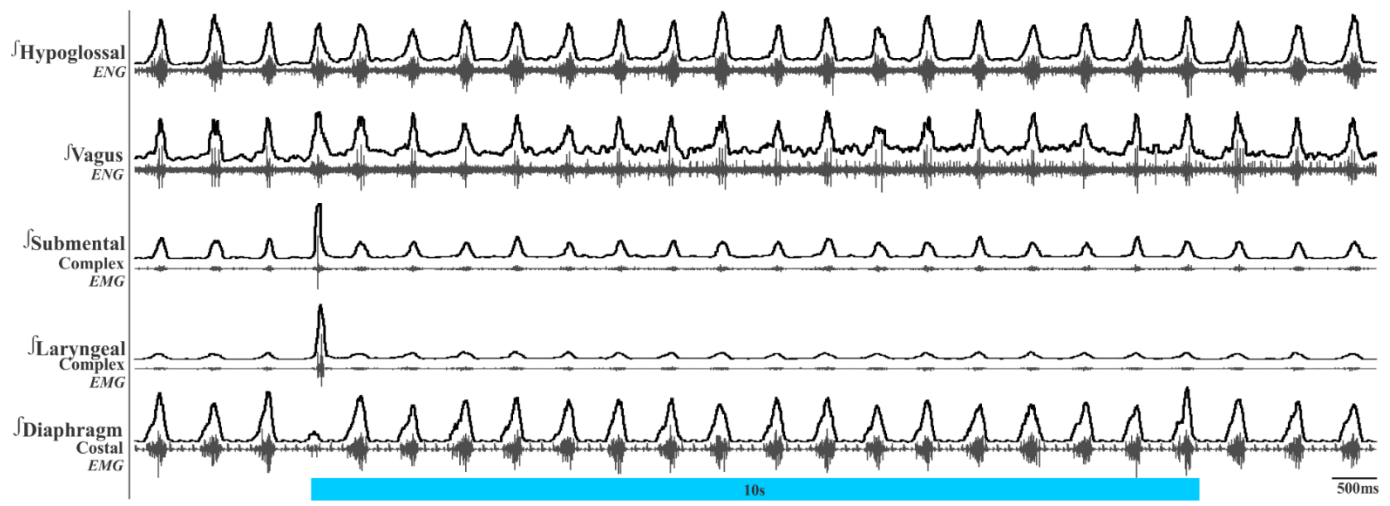

Supplement: supp [file elife-86103-supp-v1.zip]
